# Supplementary material for: Effects of Dietary Carbohydrate Concentration and Glycemic Index on Blood Glucose Variability and Free Fatty Acids in Individuals with Type 1 Diabetes
Source: MDPI journal article supplement (doi:10.3390/nu16091383), 2024-05-02
Supplement: s1 [file s1]

## Supplementary Figures and Captions

**Suppl. Figure S1.** Macronutrient percentages of the administered sample diets.

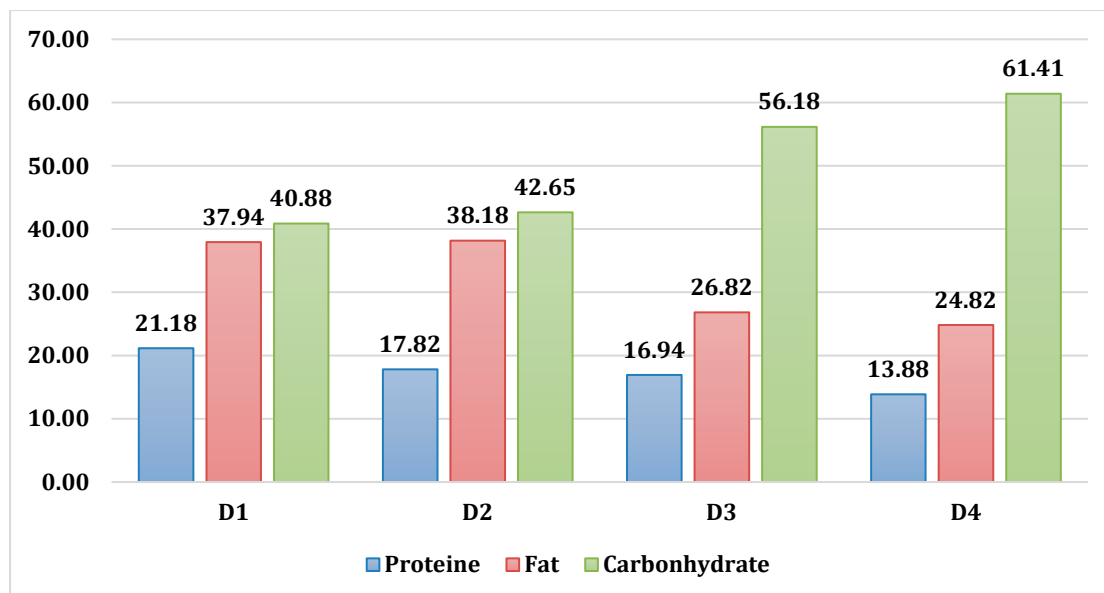

**Suppl. Figure S2.** Flowchart of the study.

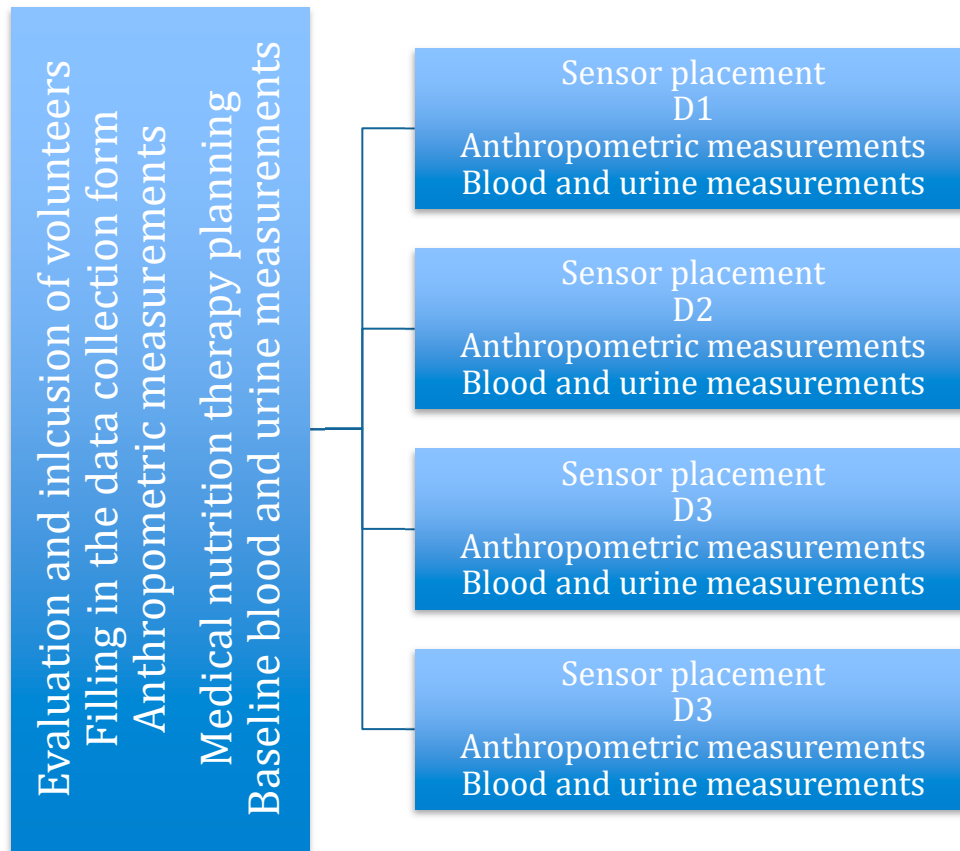

## Supplementary Tables and Titles & Footnotes

**Suppl. Table S1.** Description of the sample diet administered in the study.

|          |                                                                                                                                                                              |
|----------|------------------------------------------------------------------------------------------------------------------------------------------------------------------------------|
| Diet 1   | <ul style="list-style-type: none"><li>• Low glycemic index diet with 40% carbohydrates tailored to the participant's energy needs</li></ul>                                  |
| Diet 2   | <ul style="list-style-type: none"><li>• High glycemic index diet with 40% carbohydrates tailored to the participant's energy needs</li></ul>                                 |
| Diet 3   | <ul style="list-style-type: none"><li>• Low glycemic index diet with 60% carbohydrates tailored to the participant's energy needs</li></ul>                                  |
| Diet 4   | <ul style="list-style-type: none"><li>• High glycemic index diet with 60% carbohydrates tailored to the participant's energy needs</li></ul>                                 |
| WASH-OUT | <ul style="list-style-type: none"><li>• Medical nutrition therapy with 50% carbohydrate was administered (same as the standardization diet given at the baseline).</li></ul> |

**Suppl. Table S2.** Macronutrient contents of the sample diets administered in the study.

|                  |                                                                                                                                                                                      |
|------------------|--------------------------------------------------------------------------------------------------------------------------------------------------------------------------------------|
| Diets<br>1 and 2 | <ul style="list-style-type: none"><li>• The contribution of carbohydrates (avg. 41.2%-42.8%), protein (avg. 18.7%-21.3%) and fat (avg. 37.3%-37.4%) to energy was similar.</li></ul> |
| Diets<br>3 and 4 | <ul style="list-style-type: none"><li>• The contribution of carbohydrates (avg. 57.3%-62.2%), protein (avg. 14.2%-17.0%) and fat (avg. 23.7%-26.5%) to energy was similar.</li></ul> |
| Diets<br>1 and 3 | <ul style="list-style-type: none"><li>• Meals were set with a low glycemic index and similar glycemic index values.</li></ul>                                                        |
| Diets<br>2 and 4 | <ul style="list-style-type: none"><li>• Meals were set with a high glycemic index and similar glycemic index values.</li></ul>                                                       |

**Suppl. Table S3.** Macronutrient distribution and percentage of the diet groups (%).

|                | Male      |       | Female    |       | Test statistics, p value                                                                            | Pairwise comparisons              |
|----------------|-----------|-------|-----------|-------|-----------------------------------------------------------------------------------------------------|-----------------------------------|
|                | $\bar{X}$ | SD    | $\bar{X}$ | SD    |                                                                                                     |                                   |
| CHO (g) D1     | 268.03    | 44.51 | 196.21    | 29.56 |                                                                                                     | D1-D3: $p<0.001^*$                |
| CHO (g) D2     | 265.08    | 35.35 | 187.09    | 48.08 |                                                                                                     | D1-D4: $p<0.001^*$                |
| CHO (g) D3     | 393       | 39.9  | 270.26    | 31.42 |                                                                                                     | D2-D3: $p<0.001^*$                |
| CHO (g) D4     | 396.05    | 71.24 | 277.34    | 27.43 |                                                                                                     |                                   |
| CHO (%) D1     | 41.22     | 2.44  | 40.5      | 4.24  |                                                                                                     | 3: $p<0.001^*$ D3-D4: $p=0.004^*$ |
| CHO (%) D2     | 42.78     | 2.22  | 42.5      | 4.34  |                                                                                                     | D1-D4: $p<0.001^*$                |
| CHO (%) D3     | 57.33     | 1     | 54.88     | 2.64  |                                                                                                     | D2-D3: $p<0.001^*$                |
| CHO (%) D4     | 62.22     | 1.56  | 60.5      | 2.2   |                                                                                                     | D2-D4: $p<0.001^*$                |
| Protein (g) D1 | 138.28    | 19.57 | 101.09    | 8.8   | Group: $F=4.193$ , $p=0.011$<br>Gender: $F=4.805$ , $p=0.045$<br>Group*Gender: $F=2.417$ , $p=0.08$ | D1-D2: $p=0.014^*$                |
| Protein (g) D2 | 103.41    | 25.73 | 85.59     | 15.86 |                                                                                                     | D1-D2: $p=0.013^*$                |
| Protein (g) D3 | 101.54    | 28.25 | 107.8     | 27.27 |                                                                                                     | D1-D4: $p=0.029^*$                |
| Protein (g) D4 | 100.46    | 29.97 | 89.23     | 33.51 |                                                                                                     |                                   |

|                |        |       |       |      |                                                                                      |                 |                 |
|----------------|--------|-------|-------|------|--------------------------------------------------------------------------------------|-----------------|-----------------|
| Protein (%) D1 | 21.33  | 1     | 21    | 1.07 | Group: F=60.69, p<0.001<br>Gender: F=5.074, p=0.040<br>Group*Gender: F=1.227, p=0.30 | 2: p<0.001*     | D3-D4: p<0.001* |
| Protein (%) D2 | 18.78  | 2.33  | 16.75 | 3.01 |                                                                                      | D1-D3: p<0.001* |                 |
| Protein (%) D3 | 17     | 0.5   | 16.88 | 1.13 |                                                                                      | D1-D4: p<0.001* |                 |
| Protein (%) D4 | 14.22  | 0.83  | 13.5  | 0.93 |                                                                                      | D2-D4: p<0.001* |                 |
| Fat (g) D1     | 111.16 | 13.19 | 85.96 | 7.86 | Group: F=210.8, p<0.001<br>Gender: F=22.16, p<0.001<br>Group*Gender: F=7.09, p=0.004 | D1-D3: p<0.001* |                 |
| Fat (g) D2     | 105.61 | 12.82 | 77.62 | 8.97 |                                                                                      | D1-D4: p<0.001* |                 |
| Fat (g) D3     | 80.63  | 9.31  | 63.58 | 7.87 |                                                                                      | D2-D4: p<0.001* |                 |
| Fat (g) D4     | 69.48  | 11.33 | 54.37 | 7.62 |                                                                                      | D3-D4: p<0.001* |                 |
|                |        |       |       |      | Group: F=166.1, p<0.001                                                              |                 |                 |
| Fat (%) D1     | 37.33  | 1.8   | 38.63 | 3.89 | Gender: F=14.41, p=0.002<br>Group*Gender: F=0.335, p=0.80                            | D1-D3: p<0.001* | D3-D4: p=0.004* |
| Fat (%) D2     | 37.44  | 1.94  | 39    | 3.46 |                                                                                      | D1-D4: p<0.001* |                 |
| Fat (%) D3     | 25.56  | 0.88  | 28.25 | 1.58 |                                                                                      | D2-D3: p<0.001* |                 |
| Fat (%) D4     | 23.78  | 0.97  | 26    | 1.69 |                                                                                      | D2-D4: p<0.001* |                 |

CHO: carbohydrates, D1: diet 1, D2: diet 2, D3: diet 3, D4: diet 4.

\*p<0.001

**Suppl. Table S4.** Comparison of the glycemic index and glycemic load averages in dietary interventions for main meals and snacks.

| Measurements        | Mean  | SD    | Min   | Max    | Test statistics,<br>p value | Pairwise comparisons          |
|---------------------|-------|-------|-------|--------|-----------------------------|-------------------------------|
| Breakfast GL-D1     | 13.07 | 4.31  | 5.46  | 19.04  |                             | D1-D2: p<0.001                |
| Breakfast GL-D2     | 32.06 | 8.1   | 22.31 | 48.16  | F=80.104,                   | D1-D3: p=0.005                |
| Breakfast GL-D3     | 17.35 | 4.69  | 10.2  | 24.81  | p <0.001*                   | D1-D4: p<0.001                |
| Breakfast GL-D4     | 38    | 9.76  | 16.95 | 54.29  |                             | D3-D4: p<0.001                |
| Snack GL-D1         | 4.43  | 0.3   | 3.64  | 5.29   | F=9.029,<br>p=0.002*        | D1-D4: p=0.001                |
| Snack GL-D2         | 5.33  | 2.81  | 0     | 9.25   |                             | D3-D4: p=0.001                |
| Snack GL-D3         | 4.59  | 0.33  | 44.44 | 5.29   |                             |                               |
| Snack GL-D4         | 7.51  | 2.46  | 4.72  | 11.17  |                             |                               |
| Lunch GL-D1         | 20.75 | 6.81  | 11.13 | 38.55  |                             | D1-D2: p<0.001 D2-D4: p<0.001 |
| Lunch GL-D2         | 45.72 | 15.84 | 22.21 | 70.3   | F=82.511,<br>p <0.001*      | D1-D3: p<0.001 D3-D4: p<0.001 |
| Lunch GL-D3         | 33.57 | 10.52 | 19.11 | 51.92  |                             | D1-D4: p<0.001                |
| Lunch GL-D4         | 75.1  | 23.02 | 38.72 | 118.93 |                             | D2-D3: p=0.009                |
| Mid-afternoon GL-D1 | 3.84  | 0.59  | 3.31  | 5.29   | F=17.157,<br>p <0.001*      | D1-D4: p<0.001                |
| Mid-afternoon GL-D2 | 5.91  | 2.93  | 0.17  | 12.68  |                             | D2-D4: p=0.031                |
| Mid-afternoon GL-D3 | 5.31  | 2.52  | 3.64  | 10.58  |                             | D3-D4: p=0.002                |
| Mid-afternoon GL-D4 | 9.81  | 3.58  | 5.68  | 16.33  |                             |                               |
| Dinner GL-D1        | 21.18 | 6.46  | 11.13 | 38.55  | F=79.036,                   | D1-D2: p<0.001 D2-D4: p<0.001 |

|                 |       |       |       |        |                        |                |                |
|-----------------|-------|-------|-------|--------|------------------------|----------------|----------------|
|                 |       |       |       |        | p <0.001*              |                |                |
| Dinner GL-D2    | 46.2  | 15.24 | 22.23 | 70.3   |                        | D1-D3: p<0.001 | D3-D4: p<0.001 |
| Dinner GL-D3    | 33.77 | 10.22 | 19.11 | 51.92  |                        | D1-D4: p<0.001 | Dinner GL-D3   |
| Dinner GL-D4    | 76.46 | 24.38 | 38.72 | 118.93 |                        | D2-D3: p=0.007 | Dinner GL-D4   |
|                 |       |       |       |        | F=9.994,<br>p <0.001*  |                |                |
| Supper GL-D1    | 5.43  | 2.1   | 2.96  | 9.32   |                        | D1-D4: p=0.002 |                |
| Supper GL-D2    | 7.41  | 4.27  | 2.7   | 17.82  |                        | D2-D4: p=0.021 |                |
| Supper GL-D3    | 7.07  | 1.42  | 2.96  | 10.23  |                        | D3-D4: p=0.010 |                |
| Supper GL-D4    | 10.53 | 3.73  | 5.67  | 20.93  |                        |                |                |
|                 |       |       |       |        | F=996.5,<br>p <0.001*  |                |                |
| Breakfast GI-D1 | 40.65 | 2.15  | 36.24 | 42.28  |                        | D1-D2: p<0.001 | D3-D4: p<0.001 |
| Breakfast GI-D2 | 75.76 | 3.05  | 68.63 | 79.27  |                        | D1-D3: p<0.001 |                |
| Breakfast GI-D3 | 43.86 | 1.78  | 39.5  | 46.39  |                        | D1-D4: p<0.001 |                |
| Breakfast GI-D4 | 75.35 | 2.35  | 69.3  | 80.15  |                        | D2-D3: p<0.001 |                |
|                 |       |       |       |        | F=19.37,<br>p <0.001*  |                |                |
| Snack GI-D1     | 33.41 | 2.05  | 31    | 38.99  |                        | D1-D3: p=0.004 |                |
| Snack GI-D2     | 41.36 | 14.33 | 0.14  | 59.9   |                        | D1-D4: p<0.001 |                |
| Snack GI-D3     | 37.06 | 2.36  | 36    | 42     |                        | D3-D4: p<0.001 |                |
| Snack GI-D4     | 53.79 | 5.73  | 44    | 63.78  |                        |                |                |
|                 |       |       |       |        | F=2307.0,<br>p <0.001* |                |                |
| Lunch GI-D1     | 32.57 | 2.73  | 28.98 | 38.02  |                        | D1-D2: p<0.001 | Lunch GI-D1    |
| Lunch GI-D2     | 72.5  | 1.54  | 67.74 | 74.11  |                        | D1-D4: p<0.001 | Lunch GI-D2    |
| Lunch GI-D3     | 34.5  | 2.21  | 29.89 | 38.46  |                        | D2-D3: p<0.001 | Lunch GI-D3    |
| Lunch GI-D4     | 72    | 0.83  | 69.78 | 73.95  |                        | D3-D4: p<0.001 | Lunch GI-D4    |



|                     |       |       |       |       |                        |                |              |
|---------------------|-------|-------|-------|-------|------------------------|----------------|--------------|
| Mid-afternoon GI-D1 | 38.3  | 1.49  | 36    | 42    | F=5.45,<br>p=0.022*    | D1-D4: p=0.006 |              |
| Mid-afternoon GI-D2 | 37.73 | 12.06 | 2.9   | 59.77 |                        | D3-D4: p=0.004 |              |
| Mid-afternoon GI-D3 | 38.93 | 1.79  | 36.9  | 42    |                        |                |              |
| Mid-afternoon GI-D4 | 47.2  | 8.89  | 36.83 | 59.95 |                        |                |              |
| Dinner GI-D1        | 32.77 | 2.78  | 28.98 | 40.03 | F=2183.4,<br>p <0.001* | D1-D2: p<0.001 | Dinner GI-D1 |
| Dinner GI-D2        | 72.5  | 1.54  | 67.74 | 74.11 |                        | D1-D4: p<0.001 | Dinner GI-D2 |
| Dinner GI-D3        | 34.47 | 2.4   | 29.89 | 38.46 |                        | D2-D3: p<0.001 | Dinner GI-D3 |
| Dinner GI-D4        | 72    | 0.83  | 69.78 | 73.95 |                        | D3-D4: p<0.001 | Dinner GI-D4 |
| Supper GI-D1        | 36.43 | 1.52  | 35.39 | 42    | F=14.04,<br>p <0.001*  | D1-D3: p<0.001 | Supper GI-D1 |
| Supper GI-D2        | 40.82 | 9.79  | 30.25 | 59.77 |                        | D1-D4: p=0.001 | Supper GI-D2 |
| Supper GI-D3        | 34.05 | 0.94  | 31    | 35.65 |                        | D3-D4: p<0.001 | Supper GI-D3 |
| Supper GI-D4        | 47.47 | 8.78  | 31    | 61.36 |                        |                | Supper GI-D4 |

*D1: diet 1, D2: diet 2, D3: diet 3, D4: diet 4, GI: glycemic index, GL: glycemic load.*

*\*p<0.001*

**Suppl. Table S5.** Energy and carbohydrate contents of the diet groups by gender.

|                  | Male      |        | Female    |        | Test statistics, p value                                                             | Pairwise comparisons                 |
|------------------|-----------|--------|-----------|--------|--------------------------------------------------------------------------------------|--------------------------------------|
|                  | $\bar{X}$ | SS     | $\bar{X}$ | SS     |                                                                                      |                                      |
| Energy (kcal) D1 | 2664.55   | 351.9  | 1996.99   | 155.39 | Group: F=0.663, p=0.58<br>Gender: F=17.450, p=0.001<br>Group*Gender: F=1.953, p=0.14 | NA                                   |
| Energy (kcal) D2 | 2502.56   | 416    | 1873.91   | 206.63 |                                                                                      |                                      |
| Energy (kcal) D3 | 2374.33   | 482.72 | 1986.25   | 160.96 |                                                                                      |                                      |
| Energy (kcal) D4 | 2303.52   | 569.08 | 2147.99   | 398.26 |                                                                                      |                                      |
| CHO (g) D1       | 268.03    | 44.51  | 196.21    | 29.56  |                                                                                      | D1-D3: p<0.001*                      |
| CHO (g) D2       | 265.08    | 35.35  | 187.09    | 48.08  |                                                                                      | D1-D4: p<0.001*                      |
| CHO (g) D3       | 393.00    | 39.90  | 270.26    | 31.42  |                                                                                      | D2-D3: p<0.001*                      |
| CHO (g) D4       | 396.05    | 71.24  | 277.34    | 27.43  |                                                                                      |                                      |
| CHO (%) D1       | 41.22     | 2.44   | 40.5      | 4.24   |                                                                                      | D1-D3: p<0.001*      D3-D4: p=0.004* |
| CHO (%) D2       | 42.78     | 2.22   | 42.5      | 4.34   |                                                                                      | D1-D4: p<0.001*                      |
| CHO (%) D3       | 57.33     | 1.00   | 54.88     | 2.64   |                                                                                      | D2-D3: p<0.001*                      |
| CHO (%) D4       | 62.22     | 1.56   | 60.50     | 2.20   |                                                                                      | D2-D4: p<0.001*                      |

*CHO: carbohydrates, D1: diet 1, D2: diet 2, D3: diet 3, D4: diet 4, NA: not applicable.*

*\* $p < 0.00$*
